# Supplementary material
Source: ML conference proceedings conference paper supplement (https://proceedings.mlr.press/v80/agrawal18b.html)
Supplement: Supplementary file [file agrawal18b-supp.pdf]

## A. Proof of Theorem 2

Without loss of generality, let's assume that  $\mathbf{r}_{\max}$  is 1. This can be obtained by dividing all  $\mathbf{r}_{i,a}$  by  $\mathbf{r}_{\min}$ .  $\mathbf{r}_{\min}$  in the processed instance is then in fact the ratio of  $\mathbf{r}_{\min}$  and  $\mathbf{r}_{\max}$  of the original instance. Let  $\mathbf{x}_{i,a}^R$  and  $\beta_a^R$  denote the value of assignments and priority scores at the end of  $R$  iterations of Algorithm 2 (before the processing in the last step was done to handle over-allocated advertisers). And, let  $\mathbf{x}_{i,a}^M$  denote the feasible assignments obtained after the processing in the last step of the algorithm. Let  $\text{weight}(M) := \sum_{i,a \in \mathbb{E}} \mathbf{r}_{i,a} \mathbf{x}_{i,a}^M$  denote the weight of this feasible fractional matching  $M$ .

Now, initially,  $\beta_a = (1 + \epsilon)^{-R}$ . From Lemma 3, we have that for every  $a$ , either  $\sum_{i \in \mathbb{N}_a} \mathbf{x}_{i,a}^R \in [(1 + \epsilon)^{-2} \mathbf{C}_a, (1 + \epsilon)^2 \mathbf{C}_a]$ , i.e., the advertiser budget constraint is approximately satisfied; or, we will have that  $\beta_a$  was continuously increased/decreased by  $(1 + \epsilon)$  factor for all  $R$  iterations, so that  $\beta_a^R$  is either 1 or  $(1 + \epsilon)^{-2R}$ . Let us call the first set of advertisers where the budget constraint is approximately satisfied as  $\mathcal{E}$ . For these advertisers,  $|\mathbf{C}_a - \sum_{i \in \mathbb{N}_a} \mathbf{x}_{i,a}| \leq 3\epsilon \mathbf{C}_a$  for any  $\epsilon \leq 1$ . Also,  $\beta_a^R \geq (1 + \epsilon)^{-2R}$ . Among the second set, let  $\mathcal{O}$  be the set of advertisers  $a \in \mathbb{A}$  with  $\beta_a^R = (1 + \epsilon)^{-2R}$ . Here,  $\beta_a$  was continuously decreased in order to decrease the allocation, and these advertisers will be over-allocated in the end. For the remaining  $a \notin \mathcal{E}, a \notin \mathcal{O}$ , we have  $\beta_a^R = 1$ .

Using the upper bound from (10), and substituting the value of  $\beta_a^R$ , we have that

$$\begin{aligned} \text{OPT}_\lambda &\leq \sum_{i,a} \mathbf{r}_{i,a} \mathbf{x}_{i,a}^R + \sum_{a \in \mathcal{O}} 2R\epsilon\lambda (\mathbf{C}_a - \sum_{i \in \mathbb{N}_a} \mathbf{x}_{i,a}^R) \\ &\quad + \sum_{a \in \mathcal{E}} 2R\epsilon\lambda (3\epsilon \mathbf{C}_a) + \lambda \sum_{i,a} \mathbf{x}_{i,a}^R \log(1/\mathbf{x}_{i,a}^R) \end{aligned}$$

The terms for rest of the advertisers  $a \notin \mathcal{O}, a \notin \mathcal{E}$  do not appear in above because  $\log(1/\beta_a^R) = \log(1) = 0$  for those  $a$ .

Next, we relate the above upper bound to the weight and entropy of the feasible fractional matching  $M$ . The matching  $M$  was created by removing  $\sum_{i \in \mathbb{N}_a} \mathbf{x}_{i,a}^R - \mathbf{C}_a$  edges from  $\{\mathbf{x}_{i,a}^R\}$  for every over-allocated advertiser  $a$ . Therefore, weight of matching  $M$  is at least

$$\begin{aligned} \text{weight}(M) &\geq \sum_{i,a} \mathbf{r}_{i,a} \mathbf{x}_{i,a}^R - \sum_a \left( \sum_{i \in \mathbb{N}_a} \mathbf{x}_{i,a}^R - \mathbf{C}_a \right)^+ \\ &\geq \sum_{i,a} \mathbf{r}_{i,a} \mathbf{x}_{i,a}^R \\ &\quad - \sum_{a \in \mathcal{E}} 3\epsilon \mathbf{C}_a - \sum_{a \in \mathcal{O}} \left( \sum_{i \in \mathbb{N}_a} \mathbf{x}_{i,a}^R - \mathbf{C}_a \right)^+ \end{aligned}$$

Also,  $M$  retains all the edges allocated to  $a \in \mathcal{E}$  within a

$(1 + \epsilon)^2$  factor, so that

$$\text{weight}(M) \geq \frac{\mathbf{r}_{\min}}{(1 + \epsilon)^2} \sum_{a \in \mathcal{E}} \mathbf{C}_a \quad (16)$$

Substituting these observations in above upper bound for  $\text{OPT}_\lambda$ , along with

$$R = \frac{1}{2\epsilon\lambda} (1 + \lambda \log(\bar{N})), \quad (17)$$

(where  $\bar{N} = \max_a \frac{\mathbf{C}_a}{|\mathbb{N}_a|}$ ) we get

$$\begin{aligned} \text{OPT}_\lambda &\leq \text{weight}(M) (1 + 3\epsilon(2 + \lambda \log(\bar{N}))) \frac{(1 + \epsilon)^2}{\mathbf{r}_{\min}} \\ &\quad - \sum_{a \in \mathcal{O}} \lambda \log(\bar{N}) \left( \sum_{i \in \mathbb{N}_a} \mathbf{x}_{i,a}^R - \mathbf{C}_a \right)^+ \\ &\quad + \sum_{i,a} \lambda \mathbf{x}_{i,a}^R \log\left(\frac{1}{\mathbf{x}_{i,a}^R}\right) \end{aligned} \quad (18)$$

Now, let

$$\epsilon = \frac{\mathbf{r}_{\min}}{8(2 + \lambda \log(\bar{N}))} \delta, \quad (19)$$

so that the first term in the upper bound of (18) is at most  $(1 + \frac{\delta}{2}) \text{weight}(M)$ . Now, we show that the next two terms approximate Entropy( $M$ ) :=  $\sum_{i,a} \mathbf{x}_{i,a}^M \log(\frac{1}{\mathbf{x}_{i,a}^M})$ . Recall that  $\mathbf{x}_{i,a}^M$  is the assignment of  $i, a$  in the fractional matching  $M$ , i.e., the assignment obtained after adjusting  $\mathbf{x}_{i,a}^R$  in the last step of Algorithm 2. This adjustment step ensures that  $\mathbf{x}_{i,a}^R \geq \mathbf{x}_{i,a}^M$ , and for any  $a$  with  $\mathbf{x}_{i,a}^R - \mathbf{x}_{i,a}^M > 0$ , we have  $\mathbf{x}_{i,a}^M \geq \frac{\mathbf{C}_a}{|\mathbb{N}_a|} \geq \frac{1}{\bar{N}}$ . Therefore, it is easy to see that

$$\begin{aligned} &\sum_{i,a} \mathbf{x}_{i,a}^R \log\left(\frac{1}{\mathbf{x}_{i,a}^R}\right) - \sum_{i,a} \mathbf{x}_{i,a}^M \log\left(\frac{1}{\mathbf{x}_{i,a}^M}\right) \\ &\leq \left( \sum_{i,a} \mathbf{x}_{i,a}^R - \mathbf{x}_{i,a}^M \right) \log(\bar{N}) \\ &= \sum_a \left( \sum_i \mathbf{x}_{i,a}^R - \mathbf{C}_a \right)^+ \log(\bar{N}). \end{aligned}$$

Then, using  $|\sum_{i,a} \mathbf{x}_{i,a}^R - \mathbf{C}_a| \leq 3\epsilon \mathbf{C}_a$  for  $a \in \mathcal{E}$ , relating  $\sum_{a \in \mathcal{E}} \mathbf{C}_a$  to  $\text{weight}(M)$  as in (16), and substituting the choice of  $\epsilon$ , we obtain,

$$\begin{aligned} &\sum_{i,a} \mathbf{x}_{i,a}^R \log\left(\frac{1}{\mathbf{x}_{i,a}^R}\right) - \sum_{i,a} \mathbf{x}_{i,a}^M \log\left(\frac{1}{\mathbf{x}_{i,a}^M}\right) \\ &\leq \sum_a \left( \sum_{i \in \mathbb{N}_a} (\mathbf{x}_{i,a}^R - \mathbf{C}_a) \right)^+ \log(\bar{N}) \\ &\leq \sum_{a \in \mathcal{O}} \left( \sum_{i \in \mathbb{N}_a} (\mathbf{x}_{i,a}^R - \mathbf{C}_a) \right)^+ \log(\bar{N}) + \sum_{a \in \mathcal{E}} 3\epsilon \mathbf{C}_a \log(\bar{N}) \\ &\leq \sum_{a \in \mathcal{O}} \left( \sum_{i \in \mathbb{N}_a} \mathbf{x}_{i,a}^R - \mathbf{C}_a \right)^+ \log(\bar{N}) + \frac{\delta}{2\lambda} \text{weight}(M) \end{aligned}$$

Substituting back in (18),

$$\text{OPT}_\lambda \leq (1 + \delta)\text{weight}(M) + \lambda\text{Entropy}(M)$$

Finally, from (17), substituting value of  $\epsilon$  from (19), we have the number of iterations

$$R = \frac{1}{2\epsilon\lambda} (1 + \lambda \log(\bar{N})) \leq \frac{8}{\mathbf{r}_{min}} \frac{(1 + \lambda \log(\bar{N}))^2}{\lambda\delta}$$

Then, the theorem statement is obtained on substituting back  $\mathbf{r}_{min}/\mathbf{r}_{max}$  for  $\mathbf{r}_{min}$ .
